# Supplementary material for: Types of Fluid Alteration and Developing Mechanism of Deep Marine Carbonate Reservoirs
Source: Hindawi journal article supplement (doi:10.1155/2019/3630915), 2019-06-24
Supplement: f1 [file 3630915.f1.pdf]

**Carbon, oxygen and strontium isotopes and homogenization  
temperatures of fluid inclusions**

| Well/Outcrop                                              | Sample               | Stratium          | Depth (m) | Petrology                              | <sup>87</sup> Sr/ <sup>86</sup> Sr | δ <sup>13</sup> C <sub>V-PDB</sub> (‰) | δ <sup>18</sup> O <sub>V-PDB</sub> (‰) | Homogenization temperature (Th) |              |              |
|-----------------------------------------------------------|----------------------|-------------------|-----------|----------------------------------------|------------------------------------|----------------------------------------|----------------------------------------|---------------------------------|--------------|--------------|
|                                                           |                      |                   |           |                                        |                                    |                                        |                                        | Range of Th (°C)                | Number of Th | Average (°C) |
| Seawater calcite (O) in Tarim Basin                       |                      |                   |           |                                        |                                    |                                        |                                        |                                 |              |              |
| AD3                                                       | AD3-1                | O <sub>2y</sub>   | 6526.7    | Annular radial calcite in pore         | 0.708825                           | -0.69                                  | -7.53                                  | 38.5~49.3                       | 5            | 44.3         |
| S110                                                      | S110-1               | O <sub>2y</sub>   | 6302.09   | Annular radial calcite in pore         | 0.708328                           | -0.19                                  | -8.36                                  | Liquid at room temperature      |              |              |
| S110                                                      | S110-2               | O <sub>2y</sub>   | 6302.11   | Annular radial calcite in pore         | 0.708230                           | 1.21                                   | -6.34                                  | Liquid at room temperature      |              |              |
| T738                                                      | T738-1               | O <sub>1-2y</sub> | 6068.81   | Annular radial calcite in pore         | 0.708483                           | -0.72                                  | -5.75                                  | Liquid at room temperature      |              |              |
| S94                                                       | S94-1                | O <sub>1</sub>    | 5960.5    | Annular radial calcite in pore         | 0.708710                           | -0.15                                  | -5.42                                  | 40.3~48.7                       | 7            | 43.1         |
| S94                                                       | S94-2                | O <sub>1</sub>    | 5960.6    | Annular radial calcite in pore         | <sup>0.708650</sup>                | 0.6                                    | -5.4                                   | Liquid at room temperature      |              |              |
| Shallow burial formation water calcite (O) in Tarim Basin |                      |                   |           |                                        |                                    |                                        |                                        |                                 |              |              |
| S94                                                       | S94-105              | O <sub>1</sub>    | 5960.5    | Grannular calcite                      | 0.708710                           | -0.2                                   | -9.4                                   | 55~78                           | 8            | 66.6         |
| S119                                                      | S119-3-7             | O <sub>2y</sub>   | 6078.65   | Grannular calcite                      | 0.709025                           | -0.2                                   | -7.3                                   | 60~85                           | 9            | 70.7         |
| S91                                                       | S91-206              | O <sub>1</sub>    | 5693.72   | Grannular calcite                      | 0.708779                           | 1.5                                    | -8.5                                   | 50.1~73.1                       | 12           | 59.7         |
| TP2                                                       | TP2-5                | O <sub>2y</sub>   | 6887.01   | Grannular calcite                      | 0.708347                           | 0.5                                    | -8.0                                   | 50.2~90.2                       | 6            | 65.3         |
| S94                                                       | S94-03               | O <sub>1</sub>    | 5958.82   | Grannular calcite                      | 0.708821                           | 1.4                                    | -9.3                                   | 59.0~89.7                       | 5            | 69.8         |
| Tahe                                                      | TH-1                 | O                 | /         | Grannular calcite                      | 0.708223                           | -0.78                                  | -7.46                                  | 63.0~86.0                       | 9            | 74.4         |
| Tahe                                                      | TH-2                 | O                 | /         | Grannular calcite                      | 0.708532                           | -0.48                                  | -6.26                                  | 51.0~80.0                       | 7            | 66.1         |
| Tahe                                                      | TH-3                 | O                 | /         | Grannular calcite                      |                                    | 1.10                                   | -8.19                                  |                                 |              |              |
| Tahe                                                      | TH-4                 | O                 | /         | Grannular calcite                      |                                    | 0.61                                   | -8.53                                  |                                 |              |              |
| Tahe                                                      | TH-5                 | O                 | /         | Grannular calcite                      | 0.708621                           | -0.66                                  | -6.81                                  |                                 |              |              |
| Tahe                                                      | TH-6                 | O                 | /         | Grannular calcite                      |                                    | 0.72                                   | -5.64                                  |                                 |              |              |
| Tahe                                                      | TH-7                 | O                 | /         | Grannular calcite                      |                                    | -1.79                                  | -9.53                                  |                                 |              |              |
| Meteorite mege-crystalline calcite (O) in Tarim Basin     |                      |                   |           |                                        |                                    |                                        |                                        |                                 |              |              |
| S79                                                       | S79-4                | O <sub>2y</sub>   | 5586.81   | Mege-crystalline calcite in karst cave | 0.709329                           | -0.9                                   | -14.3                                  | 42.2                            | 1            | 42.2         |
| T708                                                      | T708-9               | O <sub>1-2y</sub> | 5870.7    | Mege-crystalline calcite in karst cave |                                    | -1.3                                   | -11.8                                  | 35.5                            | 1            | 35.5         |
| AD12                                                      | AD12-1               | O <sub>1-2y</sub> | 6443.42   | Mege-crystalline calcite in karst cave | 0.709857                           | -3.4                                   | -15.9                                  | 54.8                            | 1            | 54.8         |
| S110                                                      | S110-101             | O <sub>2y</sub>   | 6323.47   | Mege-crystalline calcite in karst cave | 0.709666                           | -3.6                                   | -15.0                                  | 49.7                            | 1            | 49.7         |
| AD3                                                       | AD3-6                | O <sub>2y</sub>   | 6520.8    | Mege-crystalline calcite in karst cave | 0.709594                           | -1.6                                   | -14.8                                  |                                 |              |              |
| YQ8                                                       | YQ8-2                | O <sub>1-2y</sub> | 6628.97   | Mege-crystalline calcite in karst cave | 0.709190                           | -0.2                                   | -12.1                                  |                                 |              |              |
| AD12                                                      | AD12-4               | O <sub>1-2y</sub> | 6450.52   | Mege-crystalline calcite in karst cave | 0.709989                           | -1.5                                   | -18.8                                  | 68.6                            | 1            | 68.6         |
| T904                                                      | T904-6               | O <sub>2y</sub>   | 5896.74   | Mege-crystalline calcite in karst cave | 0.709908                           | -1.5                                   | -12.7                                  |                                 |              |              |
| T904                                                      | T904-7               | O <sub>2y</sub>   | 5898.68   | Mege-crystalline calcite in karst cave | 0.709901                           | -1.9                                   | -12.7                                  |                                 |              |              |
| AD3                                                       | AD3-11               | O <sub>2y</sub>   | 6547.84   | Mege-crystalline calcite in karst cave | 0.709777                           | -1.4                                   | -14.8                                  | 53.5                            | 1            | 53.5         |
| AD3                                                       | AD3-12               | O <sub>2y</sub>   | 6547.86   | Mege-crystalline calcite in karst cave |                                    | -1.1                                   | -16.5                                  | 65.4                            | 1            | 65.4         |
| AD3                                                       | AD3-13               | O <sub>2y</sub>   | 6547.88   | Mege-crystalline calcite in karst cave | 0.710340                           | -1.4                                   | -17.2                                  | 64.7                            | 1            | 64.7         |
| T904                                                      | T904-202             | O <sub>2y</sub>   | 5892.42   | Mege-crystalline calcite in karst cave | 0.709857                           | -1.6                                   | -13.3                                  |                                 |              |              |
| S85                                                       | S85-201              | O <sub>1</sub>    | 5960.1    | Mege-crystalline calcite in karst cave | 0.709561                           | -2.3                                   | -15.9                                  |                                 |              |              |
| Tahe                                                      | Tahe-3 <sup>Ⓞ</sup>  | O                 | /         | Mege-crystalline calcite in karst cave | 0.710558                           | -2.49                                  | -15.23                                 |                                 |              |              |
| Tahe                                                      | Tahe-8 <sup>Ⓞ</sup>  | O                 | /         | Mege-crystalline calcite in karst cave |                                    | -3.24                                  | -14.32                                 |                                 |              |              |
| Tahe                                                      | Tahe-30 <sup>Ⓞ</sup> | O                 | /         | Mege-crystalline calcite in karst cave | 0.709289                           | -2.25                                  | -14.16                                 |                                 |              |              |
| Tahe                                                      | Tahe-34 <sup>Ⓞ</sup> | O                 | /         | Mege-crystalline calcite in karst cave | 0.709554                           | 0.02                                   | -15.74                                 |                                 |              |              |
| Tahe                                                      | Tahe-39 <sup>Ⓞ</sup> | O                 | /         | Mege-crystalline calcite in karst cave | 0.709916                           | -0.33                                  | -11.44                                 |                                 |              |              |
| Tahe                                                      | Tahe-45 <sup>Ⓞ</sup> | O                 | /         | Mege-crystalline calcite in karst cave |                                    | -2.37                                  | -14.35                                 |                                 |              |              |
| Tahe                                                      | Tahe-47 <sup>Ⓞ</sup> | O                 | /         | Mege-crystalline calcite in karst cave | 0.709912                           | -1.53                                  | -12.89                                 |                                 |              |              |
| Tahe                                                      | Tahe-53 <sup>Ⓞ</sup> | O                 | /         | Mege-crystalline calcite in karst cave |                                    | -3.26                                  | -14.44                                 |                                 |              |              |
| Tahe                                                      | Tahe-62 <sup>Ⓞ</sup> | O                 | /         | Mege-crystalline calcite in karst cave | 0.709732                           | -1.58                                  | -16.10                                 |                                 |              |              |

|                                              |                      |                   |         |                                        |          |       |        |             |    |       |
|----------------------------------------------|----------------------|-------------------|---------|----------------------------------------|----------|-------|--------|-------------|----|-------|
| S85                                          | S85-1 <sup>Ⓢ</sup>   | O                 | /       | Mege-crystalline calcite in karst cave | 0.709526 | -2.30 | -17.20 |             |    |       |
| S85                                          | S85-2 <sup>Ⓢ</sup>   | O                 | /       | Mege-crystalline calcite in karst cave | 0.709580 | -2.30 | -17.00 |             |    |       |
| Hydrothermal calcite vein (O) in Tarim Basin |                      |                   |         |                                        |          |       |        |             |    |       |
| TZ12                                         | TZ12-35              | O <sub>3</sub> l  | 4653    | Calcite vein in fracture               | 0.709153 | -1.3  | -7.9   | 138.1~168.2 | 15 | 149.7 |
| Z4                                           | Z4-3C                | O <sub>3</sub> l  | 4908.22 | Calcite vein in fracture               | 0.709891 | -3.9  | -9.0   |             |    |       |
| Z4                                           | Z4-14C               | O <sub>3</sub> l  | 4909.12 | Calcite vein in fracture               | 0.709513 | -1.2  | -9.3   | 155.9~199.1 | 22 | 180   |
| Z4                                           | Z4-16                | O <sub>3</sub> l  | 4909.54 | Calcite vein in fracture               |          | -4.3  | -10.2  |             |    |       |
| TZ12                                         | TZ12-61C             | O <sub>1</sub>    | 5298.6  | Calcite vein in fracture               | 0.709049 | -1.5  | -9.9   |             |    |       |
| Z16                                          | Zh16-307             | O <sub>1</sub>    | 4755.65 | Calcite vein in fracture               | 0.709413 | -4.5  | -14.3  | 125.0~189.6 | 18 | 152.9 |
| Z16                                          | Zh16-308             | O <sub>1</sub>    | 4755.69 | Calcite vein in fracture               |          | -7.5  | -10.8  | 129.7~166.9 | 19 | 144.2 |
| Z3                                           | Z3-101               | O <sub>1</sub>    | 3837.87 | Calcite vein in fracture               |          | -2.3  | -7.9   |             |    |       |
| TZ12                                         | TZ12-55              | O <sub>1</sub>    | 5217    | Calcite vein in fracture               | 0.709137 | -1.7  | -8.4   | 145.1~198.7 | 10 | 172.5 |
| TZ12                                         | TZ12-56              | O <sub>1</sub>    | 5216.51 | Calcite vein in fracture               | 0.709103 | -4.7  | -12.8  | 108.7~173.5 | 6  | 139.2 |
| TZ12                                         | TZ12-58              | O <sub>1</sub>    | 5216.55 | Calcite vein in fracture               | 0.709532 | -3.3  | -12.6  |             |    |       |
| TZ12                                         | TZ12-42C             | O <sub>3</sub> l  | 4711.8  | Calcite vein in fracture               |          | -8.5  | -11.7  |             |    |       |
| Z4                                           | Z4-1C                | O <sub>1</sub>    | 3609.96 | Calcite vein in fracture               |          | -6.4  | -14.1  |             |    |       |
| Tahe                                         | Tahe-19 <sup>Ⓢ</sup> | O                 | /       | Calcite vein in fracture               |          | -6.1  | -9.3   | 125.6~152.3 | 8  | 142.1 |
| Tahe                                         | Tahe-20 <sup>Ⓢ</sup> | O                 | /       | Calcite vein in fracture               |          | -6.20 | -12.00 |             |    |       |
| Tahe                                         | Tahe-21 <sup>Ⓢ</sup> | O                 | /       | Calcite vein in fracture               |          | -5.48 | -10.22 |             |    |       |
| Tahe                                         | Tahe-22 <sup>Ⓢ</sup> | O                 | /       | Calcite vein in fracture               | 0.709621 | -2.94 | -10.95 |             |    |       |
| Tahe                                         | Tahe-23 <sup>Ⓢ</sup> | O                 | /       | Calcite vein in fracture               |          | -3.05 | -9.96  |             |    |       |
| Tahe                                         | Tahe-24 <sup>Ⓢ</sup> | O                 | /       | Calcite vein in fracture               |          | 5.35  | -7.93  |             |    |       |
| Tahe                                         | Tahe-25 <sup>Ⓢ</sup> | O                 | /       | Calcite vein in fracture               |          | -3.88 | -8.05  |             |    |       |
| Tahe                                         | Tahe-26 <sup>Ⓢ</sup> | O                 | /       | Calcite vein in fracture               |          | 6.39  | -7.07  |             |    |       |
| Tahe                                         | Tahe-27 <sup>Ⓢ</sup> | O                 | /       | Calcite vein in fracture               | 0.709425 | -4.14 | -11.88 |             |    |       |
| Tahe                                         | Tahe-28 <sup>Ⓢ</sup> | O                 | /       | Calcite vein in fracture               | 0.709085 | -6.03 | -13.55 |             |    |       |
| Tahe                                         | Tahe-29 <sup>Ⓢ</sup> | O                 | /       | Calcite vein in fracture               |          | -4.24 | -10.85 |             |    |       |
| Tahe                                         | Tahe-30 <sup>Ⓢ</sup> | O                 | /       | Calcite vein in fracture               |          | -3.32 | -11.55 |             |    |       |
| Tahe                                         | Tahe-31 <sup>Ⓢ</sup> | O                 | /       | Calcite vein in fracture               | 0.709219 | -6.22 | -10.83 |             |    |       |
| Tahe                                         | Tahe-32 <sup>Ⓢ</sup> | O                 | /       | Calcite vein in fracture               |          | -3.75 | -9.94  |             |    |       |
| Tahe                                         | Tahe-33 <sup>Ⓢ</sup> | O                 | /       | Calcite vein in fracture               |          | -4.59 | -11.93 |             |    |       |
| Tahe                                         | Tahe-34 <sup>Ⓢ</sup> | O                 | /       | Calcite vein in fracture               |          | -5.30 | -14.16 |             |    |       |
| Tahe                                         | Tahe-35 <sup>Ⓢ</sup> | O                 | /       | Calcite vein in fracture               | 0.709184 | -4.80 | -12.10 |             |    |       |
| Tahe                                         | Tahe-36 <sup>Ⓢ</sup> | O                 | /       | Calcite vein in fracture               | 0.709627 | -5.60 | -14.60 |             |    |       |
| Tahe                                         | Tahe-37 <sup>Ⓢ</sup> | O                 | /       | Calcite vein in fracture               | 0.709349 | -4.23 | -10.68 |             |    |       |
| Marine limestone (O) in Tarim Basin          |                      |                   |         |                                        |          |       |        |             |    |       |
| TZ12                                         | TZ12-42L             | O <sub>3</sub> l  | 4711.8  | Marine limestone                       | 0.708276 | 0.7   | -7.2   |             |    |       |
| TZ12                                         | TZ12-45              | O <sub>3</sub> l  | 4742    | Marine limestone                       | 0.708269 | 1.2   | -4.7   |             |    |       |
| TZ12                                         | TZ12-54              | O <sub>1</sub>    | 5213.5  | Marine limestone                       | 0.708754 | -0.4  | -3.9   |             |    |       |
| TZ44                                         | TZ44-9A              | O <sub>3</sub> l  | 4850.2  | Marine limestone                       | 0.708418 | 0.5   | -6.7   |             |    |       |
| Zhong11                                      | Zhong11-4            | O <sub>3</sub> l  | 5640.16 | Marine limestone                       | 0.708949 | -2.4  | -7.8   |             |    |       |
| TZ44                                         | TZ44-8A              | O <sub>3</sub> l  | 4846.6  | Marine limestone                       | 0.708397 | 0.9   | -5.1   |             |    |       |
| S76                                          | S76-3A               | O <sub>2</sub> yj | 5583.57 | Marine limestone                       | 0.708841 | 2.0   | -7.6   |             |    |       |
| S102                                         | S102-4A              | O <sub>2</sub> yj | 6046.22 | Marine limestone                       | 0.708972 | 0.4   | -7.5   |             |    |       |
| T115                                         | T115-6               | O <sub>2</sub> yj | 5586.4  | Marine limestone                       | 0.708802 | 0.5   | -5.8   |             |    |       |
| TZ12                                         | TZ12-61L             | O <sub>1</sub>    | 5298.6  | Marine limestone                       |          |       |        |             |    |       |
| S81                                          | S81-103              | O <sub>1</sub>    | 5722.12 | Marine limestone                       |          |       |        |             |    |       |

|                                                          |                |                    |         |                                        |          |      |       |                            |    |       |
|----------------------------------------------------------|----------------|--------------------|---------|----------------------------------------|----------|------|-------|----------------------------|----|-------|
| S109                                                     | S109-6A        | O <sub>2</sub> yj  | 6250.63 | Marine limestone                       |          |      |       |                            |    |       |
| S114                                                     | S114-103       | O <sub>1-2</sub> y | 6413.39 | Marine limestone                       | 0.708692 | -0.3 | -6.3  |                            |    |       |
| S114                                                     | S114-104       | O <sub>1-2</sub> y | 6461.31 | Marine limestone                       | 0.708718 | -0.8 | -5.7  |                            |    |       |
| T901                                                     | T901-105       | O <sub>2</sub> yj  | 5572.2  | Marine limestone                       | 0.708150 | 0.1  | -7.6  |                            |    |       |
| T901                                                     | T901-107       | O <sub>2</sub> yj  | 5550.4  | Marine limestone                       | 0.708632 | 0.8  | -6.1  |                            |    |       |
| Marine limestone (O) in Sichuan Basin                    |                |                    |         |                                        |          |      |       |                            |    |       |
| Qiliao                                                   | Qiliao-1A      | O <sub>1-2</sub>   | /       | Marine limestone                       |          | -1.2 | -9.6  |                            |    |       |
| Qiliao                                                   | Qiliao-2A      | O <sub>1-2</sub>   | /       | Marine limestone                       | 0.708925 | -1.3 | -7.1  |                            |    |       |
| Qiliao                                                   | Qiliao-3A      | O <sub>1-2</sub>   | /       | Marine limestone                       | 0.709104 | -0.1 | -7.7  |                            |    |       |
| Qiliao                                                   | Qiliao-4A      | O <sub>1-2</sub>   | /       | Marine limestone                       |          | -1.5 | -9.2  |                            |    |       |
| Qiliao                                                   | Qiliao-5A      | O <sub>1-2</sub>   | /       | Marine limestone                       | 0.708858 | -0.5 | -8.8  |                            |    |       |
| Qiliao                                                   | Qiliao-6A      | O <sub>1-2</sub>   | /       | Marine limestone                       | 0.709001 | -1.4 | -9.6  |                            |    |       |
| Qiliao                                                   | Qiliao-7A      | O <sub>1-2</sub>   | /       | Marine limestone                       | 0.708673 | -1.1 | -9.4  |                            |    |       |
| Qiliao                                                   | Qiliao-8A      | O <sub>1-2</sub>   | /       | Marine limestone                       |          | -1.3 | -9.2  |                            |    |       |
| Qiliao                                                   | Qiliao-9A      | O <sub>1-2</sub>   | /       | Marine limestone                       | 0.708982 | -0.3 | -8.6  |                            |    |       |
| Qiliao                                                   | Qiliao-10A     | O <sub>1-2</sub>   | /       | Marine limestone                       | 0.709033 | -0.7 | -9.6  |                            |    |       |
| Qiliao                                                   | Qiliao-11A     | O <sub>1-2</sub>   | /       | Marine limestone                       |          | -1.5 | -8.1  |                            |    |       |
| Seawater calcite (O) in Sichuan Basin                    |                |                    |         |                                        |          |      |       |                            |    |       |
| Liaojiacao                                               | Liaojiacao-1   | O <sub>2</sub>     | /       | Annular radial calcite in pore         | 0.708905 | -0.2 | -9.2  | 38.9                       | 1  | 38.9  |
| Liaojiacao                                               | Liaojiacao-2   | O <sub>2</sub>     | /       | Annular radial calcite in pore         |          | -1.6 | -10.3 |                            |    |       |
| Liaojiacao                                               | Liaojiacao-3   | O <sub>2</sub>     | /       | Annular radial calcite in pore         |          | -1.7 | -11   | 49.3                       | 1  | 49.3  |
| Liaojiacao                                               | Liaojiacao-4   | O <sub>2</sub>     | /       | Annular radial calcite in pore         |          | -1.7 | -10.3 | 42.5                       | 1  | 42.5  |
| Liaojiacao                                               | Liaojiacao-5   | O <sub>2</sub>     | /       | Annular radial calcite in pore         | 0.709102 | -1.4 | -7    |                            |    |       |
| Liaojiacao                                               | Liaojiacao-6   | O <sub>2</sub>     | /       | Annular radial calcite in pore         |          | -1.4 | -9.2  |                            |    |       |
| Qiliao                                                   | Qiliao-6       | O <sub>1-2</sub>   | /       | Annular radial calcite in pore         | 0.708997 | -1.3 | -6.9  | Liquid at room temperature |    |       |
| Qiliao                                                   | Qiliao-7       | O <sub>1-2</sub>   | /       | Annular radial calcite in pore         |          | -1.6 | -9.1  |                            |    |       |
| Qiliao                                                   | Qiliao-8       | O <sub>1-2</sub>   | /       | Annular radial calcite in pore         |          | -1.4 | -10.8 | Liquid at room temperature |    |       |
| Qiliao                                                   | Qiliao-9       | O <sub>1-2</sub>   | /       | Annular radial calcite in pore         | 0.708956 | -0.7 | -8.2  |                            |    |       |
| Qiliao                                                   | Qiliao-10      | O <sub>1-2</sub>   | /       | Annular radial calcite in pore         | 0.709022 | -1   | -8.2  |                            |    |       |
| Qiliao                                                   | Qiliao-11      | O <sub>1-2</sub>   | /       | Annular radial calcite in pore         |          | -1.6 | -9.3  |                            |    |       |
| Deep burial formation water calcite (O) in Sichuan Basin |                |                    |         |                                        |          |      |       |                            |    |       |
| Honghuayuan                                              | Honghuayuan-3  | O <sub>2</sub>     | /       | Granular calcite in pore               |          | 1.6  | -12.3 | 113.2~128.7                | 5  | 124.3 |
| Honghuayuan                                              | Honghuayuan-5  | O <sub>2</sub>     | /       | Granular calcite in pore               | 0.709105 | 1.4  | -12.5 |                            |    |       |
| Honghuayuan                                              | Honghuayuan-6  | O <sub>2</sub>     | /       | Granular calcite in pore               | 0.708925 | 0.2  | -10.5 | 103.7~108.9                | 8  | 106.7 |
| Honghuayuan                                              | Honghuayuan-8  | O <sub>2</sub>     | /       | Granular calcite in pore               | 0.708896 | -0.1 | -11   | 101.2~112.5                | 10 | 105.5 |
| Honghuayuan                                              | Honghuayuan-9  | O <sub>2</sub>     | /       | Granular calcite in pore               | 0.709098 | -0.2 | -10.8 |                            |    |       |
| Honghuayuan                                              | Honghuayuan-10 | O <sub>2</sub>     | /       | Granular calcite in pore               | 0.708936 | 1.4  | -10.8 |                            |    |       |
| Qiliao                                                   | Qiliao-13      | O <sub>1-2</sub>   | /       | Granular calcite in pore               | 0.708856 | 1.3  | -10.7 | 110~118.3                  | 7  | 113   |
| Qiliao                                                   | Qiliao-15      | O <sub>1-2</sub>   | /       | Granular calcite in pore               | 0.708982 | 0.9  | -11.5 |                            |    |       |
| Qiliao                                                   | Qiliao-16      | O <sub>1-2</sub>   | /       | Granular calcite in pore               | 0.708862 | 2.1  | -11.3 |                            |    |       |
| Qiliao                                                   | Qiliao-18      | O <sub>1-2</sub>   | /       | Granular calcite in pore               |          | 2.5  | -12.6 | 110.7~145.6                | 12 | 130.2 |
| Qiliao                                                   | Qiliao-22      | O <sub>1-2</sub>   | /       | Granular calcite in pore               | 0.709105 | 1.42 | -9.94 |                            |    |       |
| Meteoric mega-crystalline calcite (O) in Sichuan Basin   |                |                    |         |                                        |          |      |       |                            |    |       |
| Qiliao                                                   | Qiliao-1       | O <sub>1-2</sub>   | /       | Mega-crystalline calcite in karst cave |          | -3.2 | -18.2 | 62.5                       | 1  | 62.5  |
| Qiliao                                                   | Qiliao-2       | O <sub>1-2</sub>   | /       | Mega-crystalline calcite in karst cave | 0.709749 | -1.7 | -17.4 |                            |    |       |
| Qiliao                                                   | Qiliao-3       | O <sub>1-2</sub>   | /       | Mega-crystalline calcite in karst cave | 0.709343 | -4.1 | -16.2 | 58.4                       | 1  | 58.4  |

|                                                               |                      |                  |         |                                        |          |       |        |       |     |       |
|---------------------------------------------------------------|----------------------|------------------|---------|----------------------------------------|----------|-------|--------|-------|-----|-------|
| Qiliao                                                        | Qiliao-4             | O <sub>1-2</sub> | /       | Mega-crystalline calcite in karst cave | 0.709203 | -3.8  | -16.2  |       |     |       |
| Qiliao                                                        | Qiliao-5             | O <sub>1-2</sub> | /       | Mega-crystalline calcite in karst cave | 0.709538 | -2.5  | -16.8  | 59.4  | 1   | 59.4  |
| Qiliao                                                        | Qiliao-6             | O <sub>1-2</sub> | /       | Mega-crystalline calcite in karst cave | 0.710260 | -3.5  | -17.6  |       |     |       |
| Qiliao                                                        | Qiliao-7             | O <sub>1-2</sub> | /       | Mega-crystalline calcite in karst cave | 0.709970 | -4.6  | -18.0  | 75.3  | 1   | 75.3  |
| Qiliao                                                        | Qiliao-8             | O <sub>1-2</sub> | /       | Mega-crystalline calcite in karst cave |          | -2.4  | -17.8  |       |     |       |
| Crypto/Fine crystalline marine dolomite (O1) in Sichuan Basin |                      |                  |         |                                        |          |       |        |       |     |       |
| Qiliao                                                        | Qiliao-18            | O <sub>1</sub>   | /       | Crypto-crystalline dolomite            | 0.708495 | -0.9  | -7.4   |       |     |       |
| Qiliao                                                        | Qiliao-19            | O <sub>1</sub>   | /       | Crypto-crystalline dolomite            | 0.708814 | -1.1  | -7.1   |       |     |       |
| Qiliao                                                        | Qiliao-23            | O <sub>1</sub>   | /       | Fine-crystalline dolomite              | 0.708790 | 0.2   | -8.6   |       |     |       |
| Qiliao                                                        | Qiliao-25            | O <sub>1</sub>   | /       | Crypto-crystalline dolomite            | 0.708905 | 0.1   | -8.5   |       |     |       |
| Banqiao                                                       | Banqiao-52           | O <sub>1</sub>   | /       | Fine-crystalline dolomite              | 0.709064 | 0.1   | -8.9   |       |     |       |
| Banqiao                                                       | Banqiao-55           | O <sub>1</sub>   | /       | Fine-crystalline dolomite              | 0.708874 | 0.2   | -7.5   |       |     |       |
| Banqiao                                                       | Banqiao-56           | O <sub>1</sub>   | /       | Crypto-crystalline dolomite            | 0.708663 | 0.2   | -6.7   |       |     |       |
| Banqiao                                                       | Banqiao-57           | O <sub>1</sub>   | /       | Crypto-crystalline dolomite            | 0.708736 | -0.5  | -8.9   |       |     |       |
| Banqiao                                                       | Banqiao-58           | O <sub>1</sub>   | /       | Crypto-crystalline dolomite            | 0.708853 | -0.9  | -7.1   |       |     |       |
| Marine limestone (T1f) in Sichuan Basin                       |                      |                  |         |                                        |          |       |        |       |     |       |
| Nanjiang                                                      | NJ-1                 | T <sub>1f</sub>  | /       | Marine limestone                       | 0.707301 | -1    | -6.8   |       |     |       |
| Nanjiang                                                      | NJ-5                 | T <sub>1f</sub>  | /       | Marine limestone                       |          | -0.1  | -6.9   |       |     |       |
| Nanjiang                                                      | NJ-13                | T <sub>1f</sub>  | /       | Marine limestone                       | 0.707652 | 1.1   | -6.7   |       |     |       |
| Nanjiang                                                      | NJ-15                | T <sub>1f</sub>  | /       | Marine limestone                       | 0.707258 | 0.7   | -7.5   |       |     |       |
| Nanjiang                                                      | NJ-16                | T <sub>1f</sub>  | /       | Marine limestone                       | 0.707689 | 0.7   | -7.3   |       |     |       |
| Nanjiang                                                      | NJ-19                | T <sub>1f</sub>  | /       | Marine limestone                       | 0.707586 | 0.9   | -5.6   |       |     |       |
| Puguang                                                       | Puguang              | T <sub>1f</sub>  | /       | Marine limestone                       | 0.707251 | 1.549 | -5.241 |       |     |       |
| Jichang                                                       | JC-109 <sup>Ⓞ</sup>  | T <sub>1f</sub>  | /       | Marine limestone                       |          | 1.71  | -6.11  |       |     |       |
| Jichang                                                       | JC-075 <sup>Ⓞ</sup>  | T <sub>1f</sub>  | /       | Marine limestone                       |          | 1.9   | -6.08  |       |     |       |
| Jichang                                                       | JC-064 <sup>Ⓞ</sup>  | T <sub>1f</sub>  | /       | Marine limestone                       |          | 1.56  | -6.43  |       |     |       |
| Jichang                                                       | JC-050 <sup>Ⓞ</sup>  | T <sub>1f</sub>  | /       | Marine limestone                       |          | 1.42  | -8.35  |       |     |       |
| Jichang                                                       | JC-047 <sup>Ⓞ</sup>  | T <sub>1f</sub>  | /       | Marine limestone                       |          | 1.18  | -8.44  |       |     |       |
| Jichang                                                       | JC-046 <sup>Ⓞ</sup>  | T <sub>1f</sub>  | /       | Marine limestone                       |          | 1.17  | -7.22  |       |     |       |
| Jichang                                                       | JC-045 <sup>Ⓞ</sup>  | T <sub>1f</sub>  | /       | Marine limestone                       |          | 1.26  | -7.39  |       |     |       |
| PG2                                                           | PG2-115              | T <sub>1f</sub>  | 5098    | Fine-crystalline dolomite              | 0.707685 | 0.31  | -7.56  |       |     |       |
| MB6                                                           | MB6-10               | T <sub>1f</sub>  | 4015.7  | Fine-crystalline dolomite              | 0.707333 | 1.62  | -6.26  |       |     |       |
| HB1                                                           | HB1-14               | T <sub>1f</sub>  | 5362.2  | Crypto-crystalline dolomite            | 0.707438 | 1.15  | -7.72  |       |     |       |
| MB2                                                           | MB2-6                | T <sub>1f</sub>  | 4145.3  | Crypto-crystalline dolomite            | 0.707695 | 2.16  | -7.07  |       |     |       |
| PG10                                                          | PG10-4               | T <sub>1f</sub>  | 6258.1  | Crypto-crystalline dolomite            | 0.707774 | -1.21 | -7.25  |       |     |       |
| MB6                                                           | MB6-6                | T <sub>1f</sub>  | 3843.9  | Crypto-crystalline dolomite            | 0.707634 | 1.81  | -6.87  |       |     |       |
| HB1                                                           | HB1-11               | T <sub>1f</sub>  | 4954    | Fine-crystalline dolomite              | 0.707558 | 1.72  | -6.33  |       |     |       |
| TSR calcite (T <sub>1f</sub> ) in Sichuan Basin               |                      |                  |         |                                        |          |       |        |       |     |       |
| PG10                                                          | PG10-101             | T <sub>1f</sub>  | 6258.1  | Blade calcite in dissolution vug       | 0.707598 | -9.3  | -10.2  | 170.2 | 1.0 | 170.2 |
| PG10                                                          | PG10-102             | T <sub>1f</sub>  | 6262.1  | Blade calcite in dissolution vug       | 0.707709 | -11.5 | -9.8   | 150.3 | 1.0 | 150.3 |
| PG10                                                          | PG10-105             | T <sub>1f</sub>  | 6262.3  | Blade calcite in dissolution vug       | 0.707801 | -12.5 | -8.6   | 218.2 | 1.0 | 218.2 |
| YB2                                                           | YB2-113              | T <sub>1f</sub>  | 6431.51 | Blade calcite in dissolution vug       | 0.707902 | -15.7 | -10.2  |       |     |       |
| YB2                                                           | YB2-115              | T <sub>1f</sub>  | 6431.61 | Blade calcite in dissolution vug       | 0.707638 | -15.7 | -11.2  | 196.5 | 1.0 | 196.5 |
| YB2                                                           | YB2-119              | T <sub>1f</sub>  | 6431.66 | Blade calcite in dissolution vug       | 0.707769 | -14.3 | -9.9   |       |     |       |
| Du-5                                                          | Du-5 <sup>Ⓞ</sup>    | T <sub>1f</sub>  | 4765.98 | Granular calcite in pore               |          | -3.5  | -7.8   |       |     |       |
| Luoja-1                                                       | Luoja-1 <sup>Ⓞ</sup> | T <sub>1f</sub>  | 3517.21 | Granular calcite in pore               |          | -3.9  | -8.1   |       |     |       |
| Qili-52                                                       | Qili-52 <sup>Ⓞ</sup> | T <sub>1f</sub>  | 3490.43 | Granular calcite in pore               | 0.707809 | -3.7  | -6.5   |       |     |       |

|                                                                             |                        |                  |         |                             |          |         |       |       |   |       |
|-----------------------------------------------------------------------------|------------------------|------------------|---------|-----------------------------|----------|---------|-------|-------|---|-------|
| Qili-52                                                                     | Qili-52 <sup>④</sup>   | T <sub>1</sub> f | 3491.89 | Granular calcite in pore    | 0.707675 | -5      | -6.9  |       |   |       |
| Zhujia-1                                                                    | Zhujia-1 <sup>④</sup>  | T <sub>1</sub> f | 5648.91 | Granular calcite in pore    |          | -4.6    | -5.5  |       |   |       |
| Luoja-5                                                                     | Luoja-5 <sup>④</sup>   | T <sub>1</sub> f | 3002.91 | Granular calcite in pore    |          | -6.1    | -5.7  |       |   |       |
| Po-1                                                                        | Po-1 <sup>④</sup>      | T <sub>1</sub> f | 3464.73 | Granular calcite in pore    |          | -6.5    | -4.1  |       |   |       |
| Po-1                                                                        | Po-1 <sup>④</sup>      | T <sub>1</sub> f | 3451.69 | Granular calcite in pore    |          | -7.4    | -6.2  |       |   |       |
| Zi-1                                                                        | Zi-1 <sup>④</sup>      | T <sub>1</sub> f | 3416.79 | Granular calcite in pore    |          | -11.4   | -4.9  |       |   |       |
| Zi-1                                                                        | Zi-1 <sup>④</sup>      | T <sub>1</sub> f | 3481.62 | Granular calcite in pore    |          | -10.3   | -6    |       |   |       |
| Po-1                                                                        | Po-1 <sup>④</sup>      | T <sub>1</sub> f | 3461.5  | Granular calcite in pore    |          | -13.8   | -6.6  |       |   |       |
| Po-4                                                                        | Po-4 <sup>④</sup>      | T <sub>1</sub> f | 238     | Granular calcite in pore    |          | -16.3   | -6    |       |   |       |
| Po-3                                                                        | Po-3 <sup>④</sup>      | T <sub>1</sub> f | 3536    | Granular calcite in pore    |          | -17     | -5.9  |       |   |       |
| Po-1                                                                        | Po-1 <sup>④</sup>      | T <sub>1</sub> f | 3464.73 | Granular calcite in pore    |          | -18.2   | -6.3  |       |   |       |
| PG1                                                                         | PG1-1 <sup>⑤</sup>     | T <sub>1</sub> f | 5421.2  | Blade calcite in vug        |          | -10.1   | -10.5 | 164.1 | 1 | 164.1 |
| PG1                                                                         | PG1-2 <sup>⑤</sup>     | T <sub>1</sub> f | 5423.2  | Blade calcite in vug        |          | -12.1   | -7.8  | 150.6 | 1 | 150.6 |
| PG1                                                                         | PG1-3 <sup>⑤</sup>     | T <sub>1</sub> f | 5426.5  | Blade calcite in vug        |          | -12     | -10.9 | 163.4 | 1 | 163.4 |
| PG1                                                                         | PG1-4 <sup>⑤</sup>     | T <sub>1</sub> f | 5428.4  | Blade calcite in vug        |          | -9.8    | -12.3 | 175.3 | 1 | 175.3 |
| PG1                                                                         | PG1-5 <sup>⑤</sup>     | T <sub>1</sub> f | 5428.6  | Blade calcite in vug        |          | -12.6   | -11.8 | 169.9 | 1 | 169.9 |
| LJ2                                                                         | LJ2 <sup>⑤</sup>       | T <sub>1</sub> f | 3400.7  | Blade calcite in vug        |          | -16.3   | -7.9  | 134.1 | 1 | 134.1 |
| LJ2-1                                                                       | LJ2-1 <sup>⑤</sup>     | T <sub>1</sub> f | /       | Blade calcite in vug        |          | -13.5   | -8.2  | 165.2 | 1 | 165.2 |
| PG2                                                                         | PG2 <sup>⑤</sup>       | T <sub>1</sub> f | 4784.5  | Blade calcite in vug        |          | -10     | -9.2  | 172.0 | 1 | 172.0 |
| PG6                                                                         | PG6 <sup>⑤</sup>       | T <sub>1</sub> f | 5145.6  | Blade calcite in vug        |          | -7.8    | -8.6  |       |   |       |
| LJ77                                                                        | LJ77 <sup>⑤</sup>      | T <sub>1</sub> f | /       | Blade calcite in vug        |          | -18.36  | -6.11 |       |   |       |
| MB3                                                                         | MB3 <sup>⑤</sup>       | T <sub>1</sub> f | /       | Blade calcite in vug        |          | -14.080 | -5.96 |       |   |       |
| D5                                                                          | D5 <sup>⑤</sup>        | T <sub>1</sub> f | 4793    | Blade calcite in vug        | 0.707530 | -16.480 | -8.59 |       |   |       |
| LJ2                                                                         | LJ2 <sup>⑤</sup>       | T <sub>1</sub> f | 3267.4  | Blade calcite in vug        | 0.707590 | -13.520 | -8.22 |       |   |       |
| P2                                                                          | P2 <sup>⑤</sup>        | T <sub>1</sub> f | /       | Blade calcite in vug        | 0.707500 | -18.870 | -8.27 |       |   |       |
| Crypto/Fine crystalline marine dolomite (T <sub>1</sub> f) in Sichuan Basin |                        |                  |         |                             |          |         |       |       |   |       |
| PL                                                                          | PL-51 <sup>⑦</sup>     | T <sub>1</sub> f | /       | Crypto-crystalline dolomite |          | 1.4     | -3.5  |       |   |       |
| PL                                                                          | PL-54 <sup>⑦</sup>     | T <sub>1</sub> f | /       | Crypto-crystalline dolomite |          | 1.7     | -3.4  |       |   |       |
| PL                                                                          | PL-56 <sup>⑦</sup>     | T <sub>1</sub> f | /       | Crypto-crystalline dolomite |          | 1.7     | -3.9  |       |   |       |
| PL                                                                          | PL-59 <sup>⑦</sup>     | T <sub>1</sub> f | /       | Crypto-crystalline dolomite |          | 1.8     | -3.8  |       |   |       |
| PL                                                                          | PL-60 <sup>⑦</sup>     | T <sub>1</sub> f | /       | Fine-crystalline dolomite   |          | 2.0     | -3.4  |       |   |       |
| MB3                                                                         | MB3-9                  | T <sub>1</sub> f | 3886.3  | Fine-crystalline dolomite   | 0.707777 | 3.27    | -3.24 |       |   |       |
| HB1                                                                         | HB1-10                 | T <sub>1</sub> f | 4847.26 | Fine-crystalline dolomite   | 0.707710 | 3.67    | -3.78 |       |   |       |
| MB3                                                                         | MB3-3                  | T <sub>1</sub> f | 3873    | Crypto-crystalline dolomite | 0.707825 | 4.37    | -2.84 |       |   |       |
| PG1                                                                         | PG1-2                  | T <sub>1</sub> f | 5305.9  | Crypto-crystalline dolomite | 0.707752 | 4.25    | -4.84 |       |   |       |
| MB4                                                                         | MB4-1                  | T <sub>1</sub> f | 3695.39 | Crypto-crystalline dolomite | 0.707712 | 3.63    | -3.62 |       |   |       |
| MB4                                                                         | MB4-3                  | T <sub>1</sub> f | 3728.9  | Crypto-crystalline dolomite | 0.707935 | 2.87    | -3.31 |       |   |       |
| MB6                                                                         | MB6-5                  | T <sub>1</sub> f | 3841.4  | Fine-crystalline dolomite   | 0.707691 | 2.62    | -3.84 |       |   |       |
| PG2                                                                         | PG2-22-1 <sup>⑧</sup>  | T <sub>1</sub> f | 4994.6  | Crypto-crystalline dolomite | 0.707740 | 2.10    | -4.17 |       |   |       |
| PG2                                                                         | PG2-20-14 <sup>⑧</sup> | T <sub>1</sub> f | 4696.6  | Crypto-crystalline dolomite | 0.707705 | 2.10    | -4.93 |       |   |       |
| PG2                                                                         | PG2-32-7 <sup>⑧</sup>  | T <sub>1</sub> f | 5082.5  | Fine-crystalline dolomite   | 0.707707 | 2.10    | -5.17 |       |   |       |
| PG2                                                                         | PG2-41-3a <sup>⑧</sup> | T <sub>1</sub> f | 5182    | Fine-crystalline dolomite   | 0.707549 | 2.30    | -3.60 |       |   |       |
| PG2                                                                         | PG2-41-3a <sup>⑧</sup> | T <sub>1</sub> f | 5182.2  | Fine-crystalline dolomite   | 0.707678 | 1.40    | -4.30 |       |   |       |
| Yangba                                                                      | YB-101                 | T <sub>1</sub> f | /       | Fine-crystalline dolomite   |          | 3.20    | -5.10 |       |   |       |
| Yangba                                                                      | YB-103                 | T <sub>1</sub> f | /       | Fine-crystalline dolomite   |          | 4.10    | -4.10 |       |   |       |
| Yangba                                                                      | YB-104                 | T <sub>1</sub> f | /       | Fine-crystalline dolomite   | 0.707652 | 2.20    | -5.20 |       |   |       |

|                                                            |                     |                  |          |                             |          |      |       |  |  |  |
|------------------------------------------------------------|---------------------|------------------|----------|-----------------------------|----------|------|-------|--|--|--|
| Yangba                                                     | YB-108              | T <sub>1</sub> f | /        | Fine-crystalline dolomite   | 0.707356 | 2.70 | -4.80 |  |  |  |
| Yangba                                                     | YB-111              | T <sub>1</sub> f | /        | Fine-crystalline dolomite   |          | 2.10 | -2.80 |  |  |  |
| Yangba                                                     | YB-112              | T <sub>1</sub> f | /        | Fine-crystalline dolomite   | 0.707763 | 0.90 | -3.30 |  |  |  |
| Yangba                                                     | YB-113              | T <sub>1</sub> f | /        | Crypto-crystalline dolomite |          | 1.50 | -2.80 |  |  |  |
| Du5                                                        | Du5-1 <sup>®</sup>  | T <sub>1</sub> f | 4761.6   | Crypto-crystalline dolomite | 0.707553 | 1.14 | -3.34 |  |  |  |
| Du5                                                        | Du5-2 <sup>®</sup>  | T <sub>1</sub> f | 4769.7   | Fine-crystalline dolomite   | 0.707420 | 0.69 | -3.38 |  |  |  |
| Du5                                                        | Du5-3 <sup>®</sup>  | T <sub>1</sub> f | 4779.8   | Fine-crystalline dolomite   | 0.707461 | 1.33 | -3.16 |  |  |  |
| Du5                                                        | Du5-5 <sup>®</sup>  | T <sub>1</sub> f | 4796.4   | Fine-crystalline dolomite   | 0.707545 | 1.44 | -4.63 |  |  |  |
| Luo2                                                       | Luo2-1 <sup>®</sup> | T <sub>1</sub> f | 3205.8   | Crypto-crystalline dolomite | 0.707726 | 1.52 | -4.67 |  |  |  |
| Luo2                                                       | Luo2-2 <sup>®</sup> | T <sub>1</sub> f | 3211.2   | Crypto-crystalline dolomite | 0.707523 | 1.32 | -2.73 |  |  |  |
| Luo2                                                       | Luo2-3 <sup>®</sup> | T <sub>1</sub> f | 3213.5   | Crypto-crystalline dolomite | 0.707406 | 1.52 | -2.99 |  |  |  |
| LJ2                                                        | LJ2 <sup>®</sup>    | T <sub>1</sub> f | 3211.5   | Crypto-crystalline dolomite | 0.707624 | 1.25 | -3.35 |  |  |  |
| LJ2                                                        | LJ2 <sup>®</sup>    | T <sub>1</sub> f | 3214.3   | Fine-crystalline dolomite   | 0.707688 | 1.9  | -4.2  |  |  |  |
| PG2                                                        | PG2 <sup>®</sup>    | T <sub>1</sub> f | 4958.5   | Fine-crystalline dolomite   | 0.707555 | 2.4  | -3.8  |  |  |  |
| PG2                                                        | PG2 <sup>®</sup>    | T <sub>1</sub> f | 4977.4   | Crypto-crystalline dolomite | 0.707667 | 2.2  | -4.9  |  |  |  |
| PG2                                                        | PG2 <sup>®</sup>    | T <sub>1</sub> f | 5185     | Crypto-crystalline dolomite | 0.707618 | 2.4  | -3.4  |  |  |  |
| PG2                                                        | PG2 <sup>®</sup>    | T <sub>1</sub> f | 5186.5   | Crypto-crystalline dolomite | 0.707618 | 2.3  | -3.6  |  |  |  |
| LJ2                                                        | LJ2 <sup>®</sup>    | T <sub>1</sub> f | /        | Crypto-crystalline dolomite | 0.707624 | 2.1  | -4.9  |  |  |  |
| Crypto/Fine crystalline marine dolomite (O) in Ordos Basin |                     |                  |          |                             |          |      |       |  |  |  |
| S338                                                       | S338-15             | O <sub>1</sub>   | 3791.07m | Crypto-crystalline dolomite |          | 0.1  | -7.1  |  |  |  |
| S338                                                       | S338-16             | O <sub>1</sub>   | 3800.04m | Fine-crystalline dolomite   |          | 0.2  | -7.1  |  |  |  |
| XF5                                                        | XF5-15              | O <sub>1</sub>   | 2892.76m | Crypto-crystalline dolomite |          | 0.4  | -6.8  |  |  |  |
| S338                                                       | S338-18             | O <sub>1</sub>   | 3790.87m | Crypto-crystalline dolomite |          | 1.2  | -6.9  |  |  |  |
| S338                                                       | S338-19             | O <sub>1</sub>   | 3790.42m | Crypto-crystalline dolomite |          | 1.1  | -7.6  |  |  |  |
| S338                                                       | S338-20             | O <sub>1</sub>   | 3700.04m | Fine-crystalline dolomite   |          | 1    | -7.8  |  |  |  |
| S338                                                       | S338-21             | O <sub>1</sub>   | 3791.07m | Crypto-crystalline dolomite |          | 1.3  | -7.7  |  |  |  |
| S338                                                       | S338-22             | O <sub>1</sub>   | 3799.5m  | Fine-crystalline dolomite   |          | 1.4  | -8    |  |  |  |
| S338                                                       | S338-23             | O <sub>1</sub>   | 3799.82m | Crypto-crystalline dolomite |          | 1.3  | -8    |  |  |  |
| S338                                                       | S338-24             | O <sub>1</sub>   | 3801.5m  | Crypto-crystalline dolomite |          | 1.2  | -7.7  |  |  |  |
| D76                                                        | D76-12              | O <sub>1</sub>   | 2823.27m | Fine-crystalline dolomite   |          | 0.5  | -7.7  |  |  |  |
| D76                                                        | D76-15              | O <sub>1</sub>   | 2821.7m  | Crypto-crystalline dolomite |          | 0.5  | -7.8  |  |  |  |
| D76                                                        | D76-16              | O <sub>1</sub>   | 2806.76m | Crypto-crystalline dolomite |          | -0.4 | -6.6  |  |  |  |
| D76                                                        | D76-17              | O <sub>1</sub>   | 2791.68m | Fine-crystalline dolomite   |          | 0.1  | -6.7  |  |  |  |
| D92                                                        | D92-3               | O <sub>1</sub>   | 2987.04m | Crypto-crystalline dolomite |          | -0.8 | -6.5  |  |  |  |
| D92                                                        | D92-4               | O <sub>1</sub>   | 2912.18m | Fine-crystalline dolomite   |          | 0.1  | -6.8  |  |  |  |
| D77                                                        | D77-1               | O <sub>1</sub>   | 2725.3m  | Fine-crystalline dolomite   |          | 0.3  | -6.9  |  |  |  |
| D77                                                        | D77-2               | O <sub>1</sub>   | 2723.41m | Fine-crystalline dolomite   |          | -0.4 | -7.7  |  |  |  |
| D42                                                        | D42-1               | O <sub>1</sub>   | 2638.5m  | Crypto-crystalline dolomite |          | -0.5 | -7.7  |  |  |  |
| D82                                                        | D82-1               | O <sub>1</sub>   | 2685m    | Crypto-crystalline dolomite |          | -0.2 | -7.1  |  |  |  |
| D82                                                        | D82-2               | O <sub>1</sub>   | 2684.53m | Crypto-crystalline dolomite |          | -0.1 | -6.7  |  |  |  |
| D98                                                        | D98-1               | O <sub>1</sub>   | 2683.31m | Crypto-crystalline dolomite |          | 0.4  | -7    |  |  |  |
| D60                                                        | D60-2               | O <sub>1</sub>   | 2923.88m | Fine-crystalline dolomite   |          | -0.5 | -6.9  |  |  |  |
| D60                                                        | D60-8               | O <sub>1</sub>   | 2923.69m | Fine-crystalline dolomite   |          | -1.2 | -7.4  |  |  |  |
| XF5                                                        | XF5-17              | O <sub>1</sub>   | 2892.76m | Fine-crystalline dolomite   |          | 0.2  | -3.7  |  |  |  |
| XF5                                                        | XF5-18              | O <sub>1</sub>   | 2892.76m | Crypto-crystalline dolomite |          | 0.8  | -3.2  |  |  |  |
| XF5                                                        | XF5-9               | O <sub>1</sub>   | 2892.76m | Fine-crystalline dolomite   |          | 0.9  | -4.6  |  |  |  |
| XF5                                                        | XF5-21              | O <sub>1</sub>   | 2892.76m | Crypto-crystalline dolomite |          | 1.3  | -7.9  |  |  |  |

|                                          |                        |                |          |                                    |      |       |  |  |  |
|------------------------------------------|------------------------|----------------|----------|------------------------------------|------|-------|--|--|--|
| XF5                                      | XF5-22                 | O <sub>1</sub> | 2892.76m | Fine-crystalline dolomite          | 1.6  | -6.5  |  |  |  |
| S338                                     | S338-26                | O <sub>1</sub> | 3799.5m  | Crypto-crystalline dolomite        | 0.7  | -5.7  |  |  |  |
| S338                                     | S338-27                | O <sub>1</sub> | 3799.82m | Crypto-crystalline dolomite        | 1.9  | -3.4  |  |  |  |
| S338                                     | S338-28                | O <sub>1</sub> | 3801.5m  | Crypto-crystalline dolomite        | -1   | -4.8  |  |  |  |
| Ordos-1                                  | Ordos-1-1 <sup>®</sup> | O <sub>1</sub> | /        | Fine-crystalline dolomite          | 0.1  | -1.7  |  |  |  |
| Ordos-1                                  | Ordos-1-2 <sup>®</sup> | O <sub>1</sub> | /        | Crypto-crystalline dolomite        | 0.1  | -0.2  |  |  |  |
| Ordos-1                                  | Ordos-1-4 <sup>®</sup> | O <sub>1</sub> | /        | Fine-crystalline dolomite          | -0.2 | -2.7  |  |  |  |
| Ordos-1                                  | Ordos-1-6 <sup>®</sup> | O <sub>1</sub> | /        | Crypto-crystalline dolomite        | -1.3 | -3.4  |  |  |  |
| Ordos-1                                  | Ordos-1-7 <sup>®</sup> | O <sub>1</sub> | /        | Fine-crystalline dolomite          | -0.5 | -3.7  |  |  |  |
| Ordos-2                                  | Ordos-2-2 <sup>®</sup> | O <sub>1</sub> | /        | Crypto-crystalline dolomite        | -1.8 | -4.1  |  |  |  |
| Ordos-2                                  | Ordos-2-4 <sup>®</sup> | O <sub>1</sub> | /        | Crypto-crystalline dolomite        | 0.9  | -3.6  |  |  |  |
| Lihua1-26                                | Lihua1-26 <sup>®</sup> | O <sub>1</sub> | /        | Crypto-crystalline dolomite        | 0.3  | -3.79 |  |  |  |
| Hydrothermal dolomite (O) in Ordos Basin |                        |                |          |                                    |      |       |  |  |  |
| D77                                      | D77-1                  | O <sub>1</sub> | /        | Coarse crystalline dolomite in vug | -1.7 | -10   |  |  |  |
| D77                                      | D77-2                  | O <sub>1</sub> | /        | Coarse crystalline dolomite in vug | -2.1 | -9.9  |  |  |  |
| D42                                      | D42-2                  | O <sub>1</sub> | /        | Coarse crystalline dolomite in vug | -2.9 | -10.5 |  |  |  |
| D82                                      | D82-1                  | O <sub>1</sub> | /        | Coarse crystalline dolomite in vug | -2.2 | -10.6 |  |  |  |
| D82                                      | D82-2                  | O <sub>1</sub> | /        | Coarse crystalline dolomite in vug | -1.7 | -10   |  |  |  |
| D98                                      | D98-2                  | O <sub>1</sub> | /        | Coarse crystalline dolomite in vug | -2.4 | -11.3 |  |  |  |
| TSR calcite (O) in Ordos Basin           |                        |                |          |                                    |      |       |  |  |  |
| XF5                                      | XF5-11                 | O <sub>1</sub> | /        | Blade calcite in dissolution vug   | -8.2 | -7.4  |  |  |  |
| XF5                                      | XF5-12                 | O <sub>1</sub> | /        | Blade calcite in dissolution vug   | -8   | -7.9  |  |  |  |
| D76                                      | D76-2                  | O <sub>1</sub> | /        | Blade calcite in dissolution vug   | -3.9 | -6.6  |  |  |  |
| D92                                      | D92-6                  | O <sub>1</sub> | /        | Blade calcite in dissolution vug   | -5.4 | -5.5  |  |  |  |
| D60                                      | D60-15                 | O <sub>1</sub> | /        | Blade calcite in dissolution vug   | -7.3 | -6.4  |  |  |  |
| D60                                      | D60-17                 | O <sub>1</sub> | /        | Blade calcite in dissolution vug   | -6.3 | -6.4  |  |  |  |
| Marine limestone (O) in Ordos Basin      |                        |                |          |                                    |      |       |  |  |  |
| Ordos-2                                  | Ordos-2-5 <sup>®</sup> | O <sub>1</sub> | /        | Marine limestone                   | -1.7 | -8.5  |  |  |  |
| Ordos-2                                  | Ordos-2-6 <sup>®</sup> | O <sub>1</sub> | /        | Marine limestone                   | -1.6 | -8.7  |  |  |  |
| Ordos-2                                  | Ordos-2-7 <sup>®</sup> | O <sub>1</sub> | /        | Marine limestone                   | -1.5 | -6.9  |  |  |  |
| Ordos-2                                  | Ordos-2-8 <sup>®</sup> | O <sub>1</sub> | /        | Marine limestone                   | -2.6 | -6.9  |  |  |  |
| Ordos-2                                  | Ordos-2-9 <sup>®</sup> | O <sub>1</sub> | /        | Marine limestone                   | -1.0 | -8.5  |  |  |  |
| XF5                                      | XF5-25                 | O <sub>1</sub> | /        | Marine limestone                   | -1.8 | -8.9  |  |  |  |
| XF5                                      | XF5-2                  | O <sub>1</sub> | /        | Marine limestone                   | -0.2 | -9.7  |  |  |  |
| XF5                                      | XF5-15                 | O <sub>1</sub> | /        | Marine limestone                   | 0.1  | -7.8  |  |  |  |
| D76                                      | D76-20                 | O <sub>1</sub> | /        | Marine limestone                   | 0.2  | -7.0  |  |  |  |
| D92                                      | D92-16                 | O <sub>1</sub> | /        | Marine limestone                   | -3.6 | -6.9  |  |  |  |

## Summary

| Fluid Type                                    | Petrology                             | Stratum          | $^{87}\text{Sr}/^{86}\text{Sr}$ |          |          |          | $\delta^{13}\text{C}_{\text{V-PDB}}$ |        |        |            | $\delta^{18}\text{O}_{\text{V-PDB}}$ |        |        |            |
|-----------------------------------------------|---------------------------------------|------------------|---------------------------------|----------|----------|----------|--------------------------------------|--------|--------|------------|--------------------------------------|--------|--------|------------|
|                                               |                                       |                  | Number                          | Max      | Min      | Average  | Number                               | Max(‰) | Min(‰) | Average(‰) | Number                               | Max(‰) | Min(‰) | Average(‰) |
| Seawater                                      | Maine Limestone                       | O                | 20                              | 0.709104 | 0.708150 | 0.708722 | 34.0                                 | 2.0    | -3.6   | -0.6       | 34                                   | -3.9   | -9.7   | -7.61      |
|                                               |                                       | T <sub>1</sub> f | 13                              | 0.707774 | 0.707251 | 0.707527 | 21.0                                 | 2.2    | -1.21  | 1.03       | 21                                   | -5.24  | -8.44  | -6.91      |
| Evaporated hypersaline seawater               | Marine dolomite                       | O                | 9                               | 0.709064 | 0.708495 | 0.708799 | 49.0                                 | 1.9    | -1.8   | 0.17       | 49                                   | -0.2   | -8.9   | -6.28      |
|                                               |                                       | T <sub>1</sub> f | 29                              | 0.707935 | 0.707356 | 0.707641 | 38.0                                 | 4.4    | 0.7    | 2.2        | 38                                   | -2.73  | -5.2   | -3.86      |
| Seawater cementation                          | Annular radial calcite in pore        | O                | 11                              | 0.709102 | 0.708230 | 0.708746 | 18.0                                 | 1.2    | -1.7   | -0.87      | 18                                   | -5.37  | -11    | -8.24      |
| Shallow Burial Formation Water                | Grannular calcite in pore             | O                | 8                               | 0.709025 | 0.708223 | 0.708632 | 12.0                                 | 1.5    | -1.8   | 0.1        | 12                                   | -5.6   | -9.5   | -7.91      |
| Deep burial formation                         | Grannular calcite in pore             | O                | 9                               | 0.709105 | 0.708856 | 0.708974 | 11.0                                 | 2.5    | -0.2   | 1.14       | 11                                   | -9.94  | -12.6  | -11.27     |
| Meteoric water in uplift-exposure environment | Megacrystalline calcite in karst cave | O                | 26                              | 0.710558 | 0.709190 | 0.709735 | 33.0                                 | 0.0    | -4.6   | -2.2       | 33                                   | -11.4  | -18.8  | -15.36     |
| Fault-hydrothermal                            | Calcite vein in fracture              | O                | 15                              | 0.709891 | 0.709049 | 0.709353 | 32.0                                 | 6.4    | -8.5   | -3.7       | 32                                   | -7.1   | -14.6  | -10.82     |
| TSR-derived                                   | Blade calcite in                      | T <sub>1</sub> f | 11                              | 0.707902 | 0.707500 | 0.707684 | 34.0                                 | -3.5   | -18.9  | -11.5      | 34                                   | -4.1   | -12.3  | -7.96      |

## References:

- ① C. Liu, G. Li, C. Zhu, G. Liu, and Y. Lu, "Geochemistry Characteristics of Carbon, Oxygen and Strontium Isotopes of Calcites Filled in Karstic Fissure-Cave in Lower-Middle Ordovician of Tahe Oilfield, Tarim Basin," *Earth Science — Journal of China University of Geosciences*, vol. 33, No. 3, pp. 377-386, 2008a (in Chinese with English abstract).
- ② C. Liu, Y. Zhang, and H. Lu, "Genesis and Evolution of Gigantic Calcites in Paleokarstic Caves of Middle-Lower Ordovician in Tahe Oilfield," *Geological Science and Technology Information*, vol. 27, pp. 33-38, 2008b (in Chinese with English abstract).
- ③ M. Chen, L. Wang, Z. Xiong, and Z. Chen, "Application of Carbon and Oxygen Isotope to Carbonate Reservoirs in Northeast Sichuan Basin," *Acta Sedimentologica Sinica*, vol. 29, no. 2, pp. 217-225, 2011 (in Chinese with English abstract).
- ④ G. Zhu, S. Zhang, Y. Liang, J. Dai, and J. Li, "Isotopic evidence of TSR origin for natural gas bearing high H<sub>2</sub>S contents within the Feixianguan Formation of the northeastern Sichuan Basin, southwestern China," *Science in China Series D-Earth Sciences*, vol. 48, no. 11, pp. 1960-1971, 2005.
- ⑤ L. Jiang, W. Richard, and C. Cai, "Generation of isotopically and compositionally distinct water during thermochemical sulfate reduction (TSR) in carbonate reservoirs: Triassic Feixianguan Formation, Sichuan Basin, China," *Geochimica et Cosmochimica Acta*, vol. 165, pp. 249-262, 2016.
- ⑥ K. Li, C. Cai, L. Jiang, L. Cai, L. Jia, B. Zhang, L. Xiang, and Y. Yuan, "Sr evolution in the Upper Permian and Lower Triassic carbonates, northeast Sichuan basin, China: Constraints from chemistry, isotope and fluid inclusions," *Applied Geochemistry*, vol. 27, no. 12, pp. 2409-2424, 2012.
- ⑦ Q. Chen, W. Hu, Q. Li, and J. Zhu, "Characteristics and genesis of dolomitization in Changxing and Feixianguan Formations in Panlongdong, northeastern Sichuan Basin," *Oil and Gas Geology*, vol. 33, no. 1, pp. 84-93, 2012 (in Chinese with English abstract).
- ⑧ L. Jiang, C. Cai, W. Richard, K. Li, and L. Xiang, "Reflux dolomitization of the Upper Permian Changxing Formation and the Lower Triassic Feixianguan Formation, NE Sichuan Basin, China," *Geofluids*, vol. 13, no. 2, pp. 232-245, 2013.
- ⑨ L. Jiang, R. Worden, and C. Cai, "Thermochemical sulfate reduction and fluid evolution of the Lower Triassic Feixianguan Formation sour gas reservoirs, northeast Sichuan Basin, China," *AAPG bulletin*, vol. 85, no. 5, pp. 947-973, 2014.
- ⑩ D. Liu, X. Sun, Z. Li, N. Tang, Y. Tan, and B. Liu, "Analysis of carbon and oxygen isotope on the Ordovician dolostones in the Ordos Basin," *Petroleum Geology and Experiment*, vol. 28, no. 2, pp. 155-161, 2006 (in Chinese with English abstract).
- ⑪ S. Huang, H. Tong, L. Liu, Z. Hu, X. Zhang, J. Huan, K. Huang, "Petrography, geochemistry and dolomitization mechanisms of Feixianguan dolomites in Triassic, NE Sichuan, China," *Acta Petrolei Sinica*, vol. 25, no. 10, pp. 2363-2372, 2009.
